# Supplementary material
Source: Springer Nature journal article supplement (https://www.springermedizin.de/resource/supplementary/12902_2014_284_MOESM1_ESM.pdf/9515962)

□ No diabetes ■ Type 1 diabetes

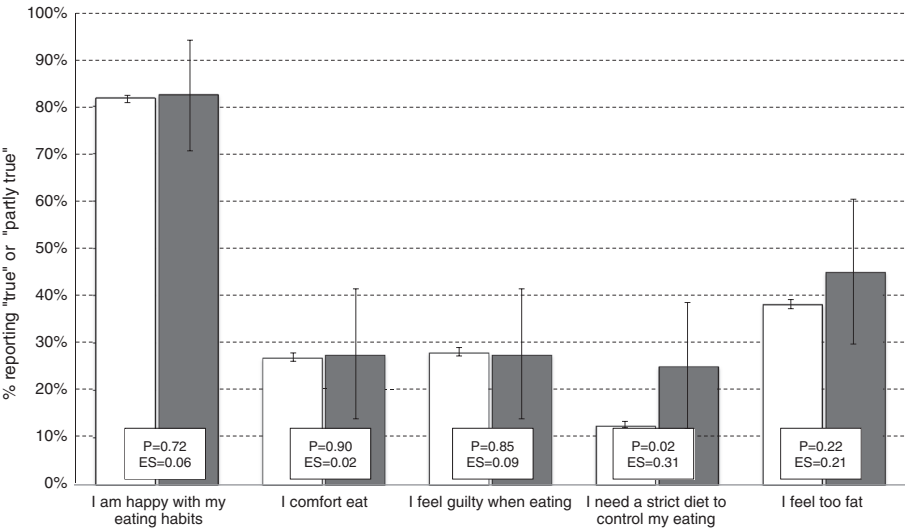

Supplement: MOESM1 [file 9515962]
